# Supplementary material for: Directly observed covalent coupling of quantum dots to single-wall carbon nanotubesElectronic supplementary information (ESI) available: TEM image of SWNTs decorated with silver colloids, and energy dispersive X-ray (EDX) spectrum. See http://www.rsc.org/suppdata/cc/b1/b110690b/
Source: Royal Society of Chemistry journal article supplement (doi:10.1039/b110690b), 2002-02-05
Supplement: b110690b.doc [file b110690b.doc]

# Supplementary data


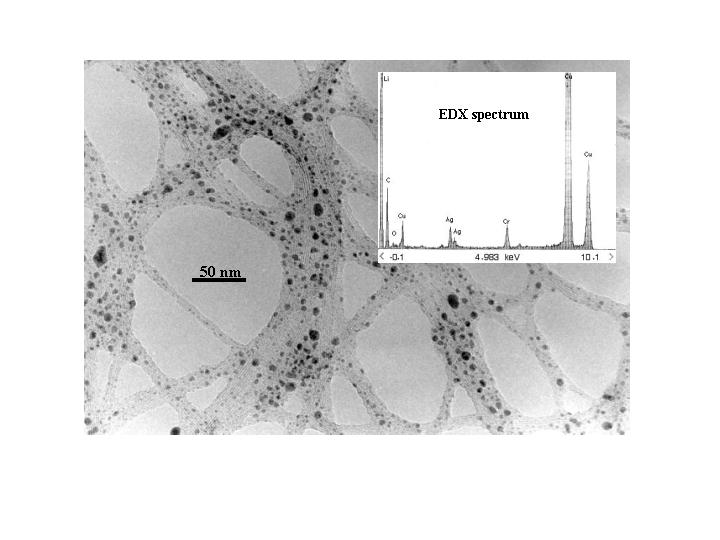


TEM image (JEOL 2000FX) of SWNTs decorated with silver colloids. Inset is the energy dispersive X-ray (EDX) spectrum, which clearly shows the presence of silver.
